# Supplementary material
Source: Springer Nature journal article supplement (https://www.springerprofessional.de/resource/supplementary/13688_2018_132_MOESM3_ESM.pdf/15435518)
Supplement: MOESM3 [file 15435518]

### Additional file 3

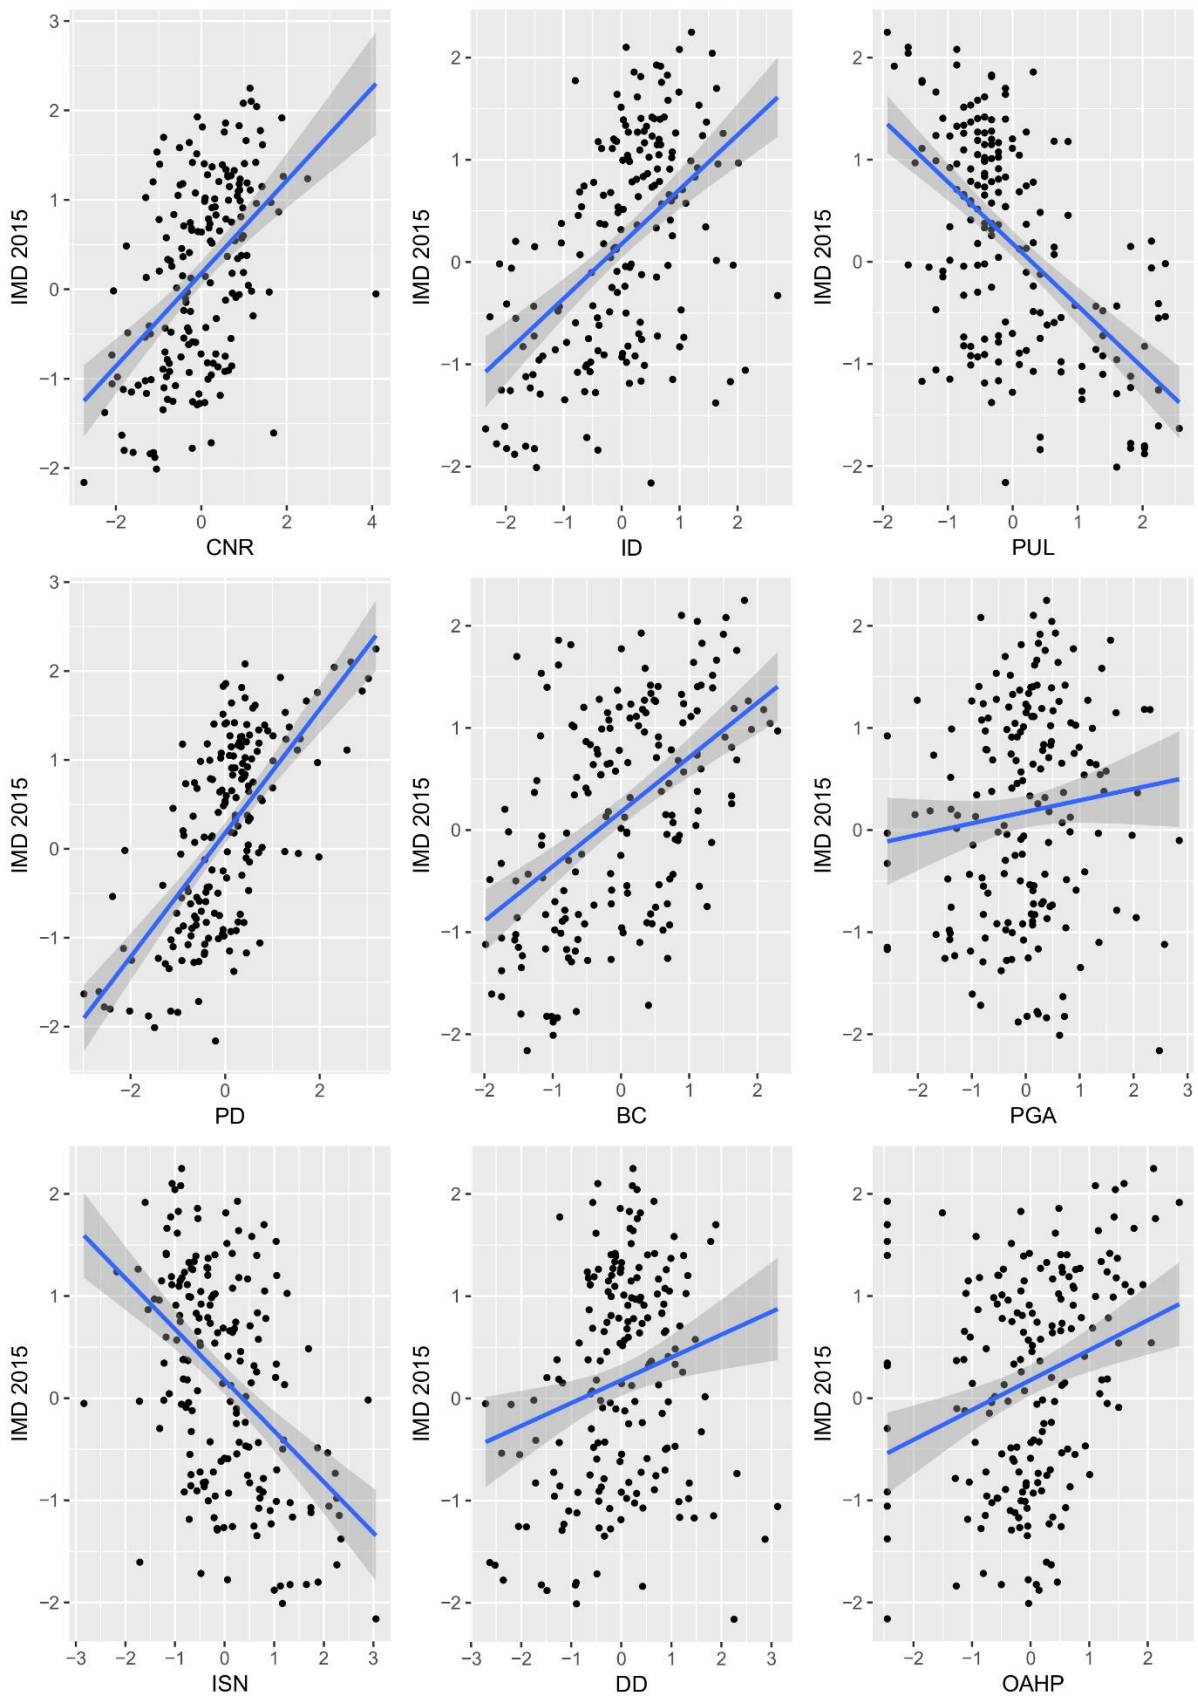

Figure 1. Correlations between metrics of urban form and IMD, for Birmingham.

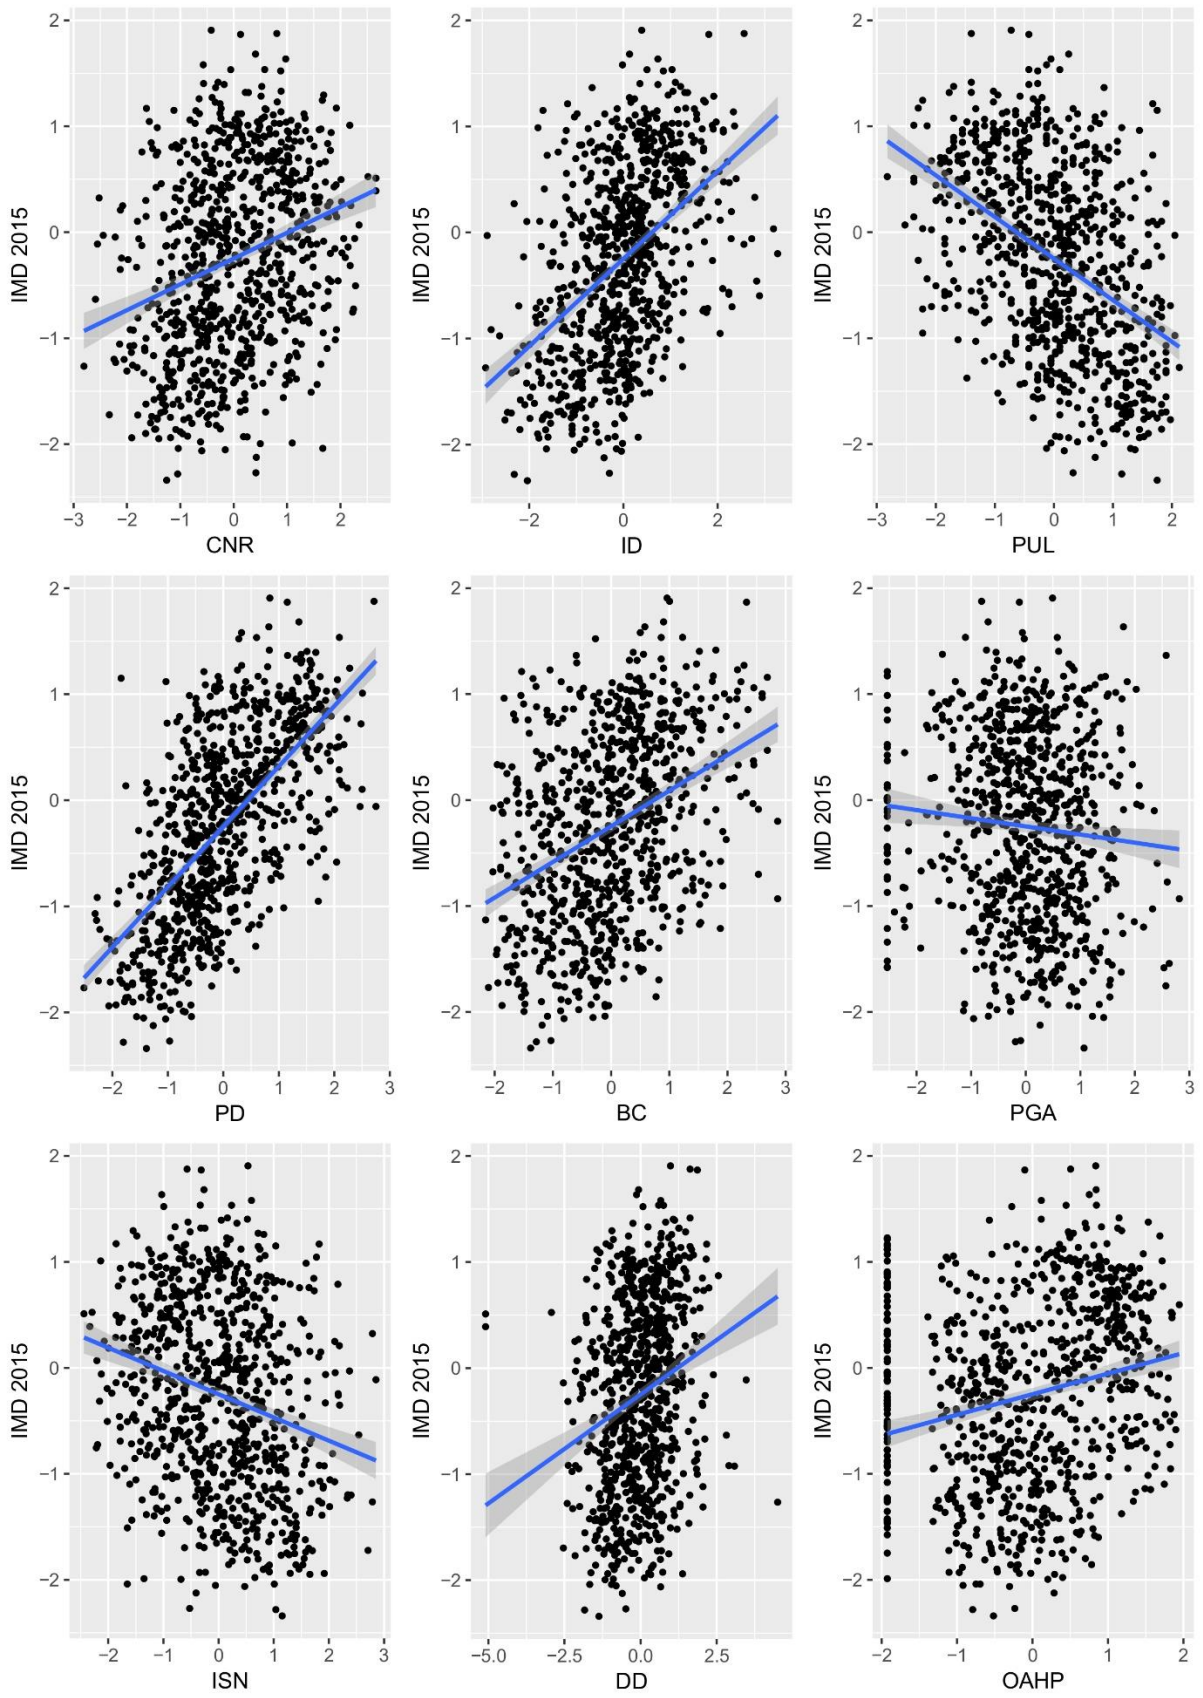

Figure 2. Correlations between metrics of urban form and IMD, for London.

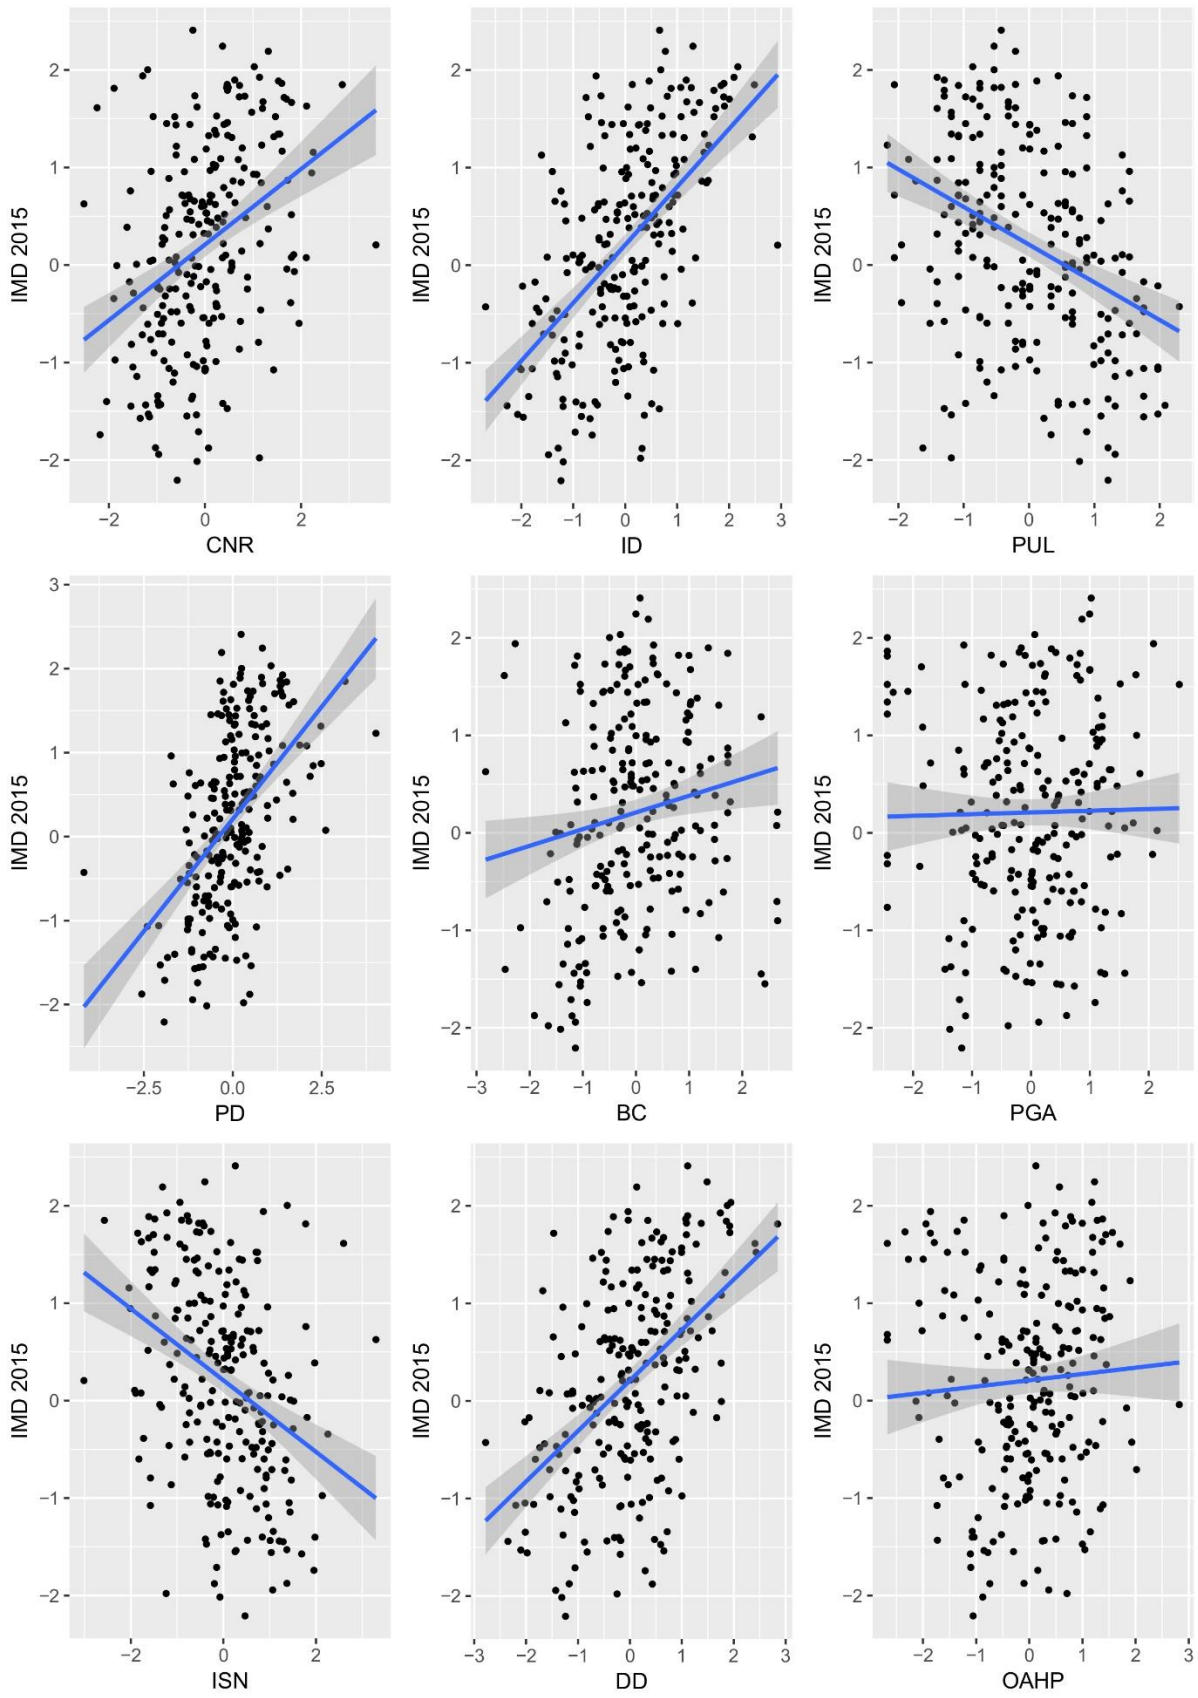

Figure 3. Correlations between metrics of urban form and IMD, for Manchester.

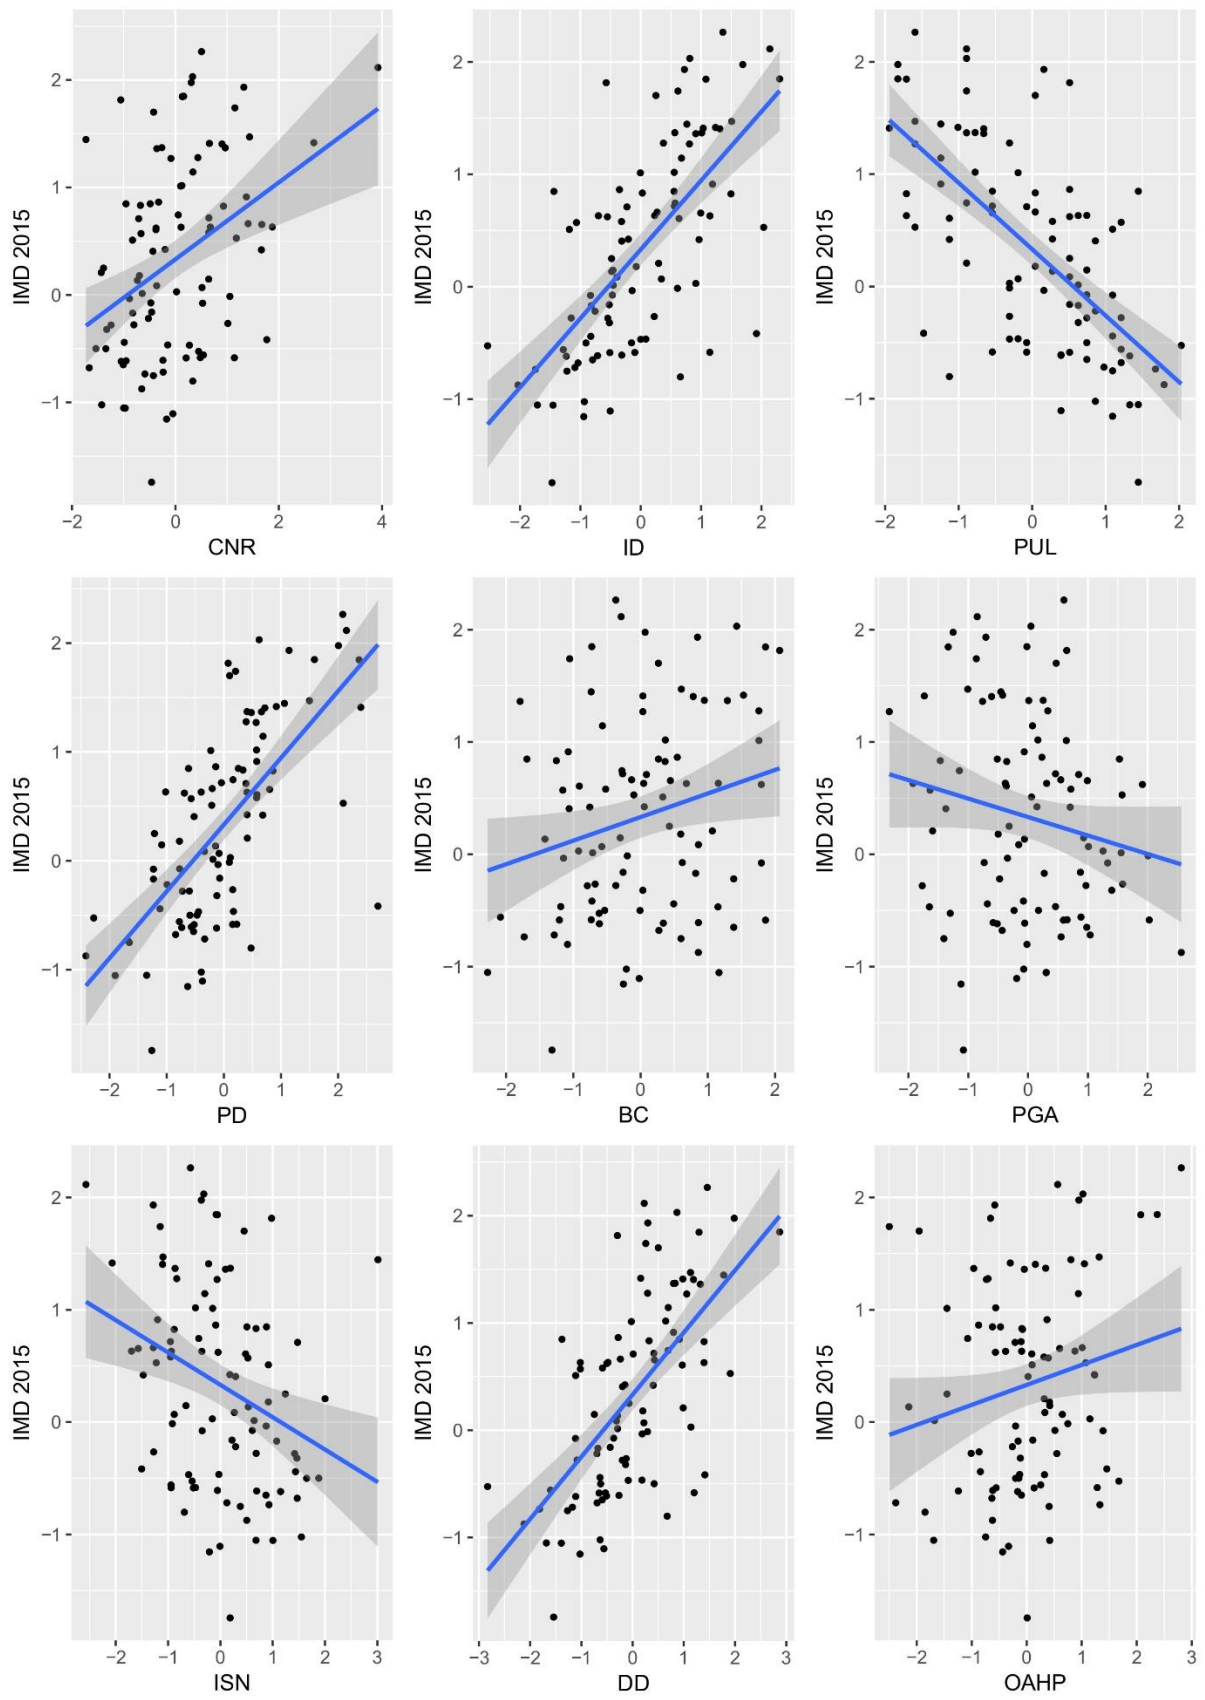

Figure 4. Correlations between metrics of urban form and IMD, for Leeds.

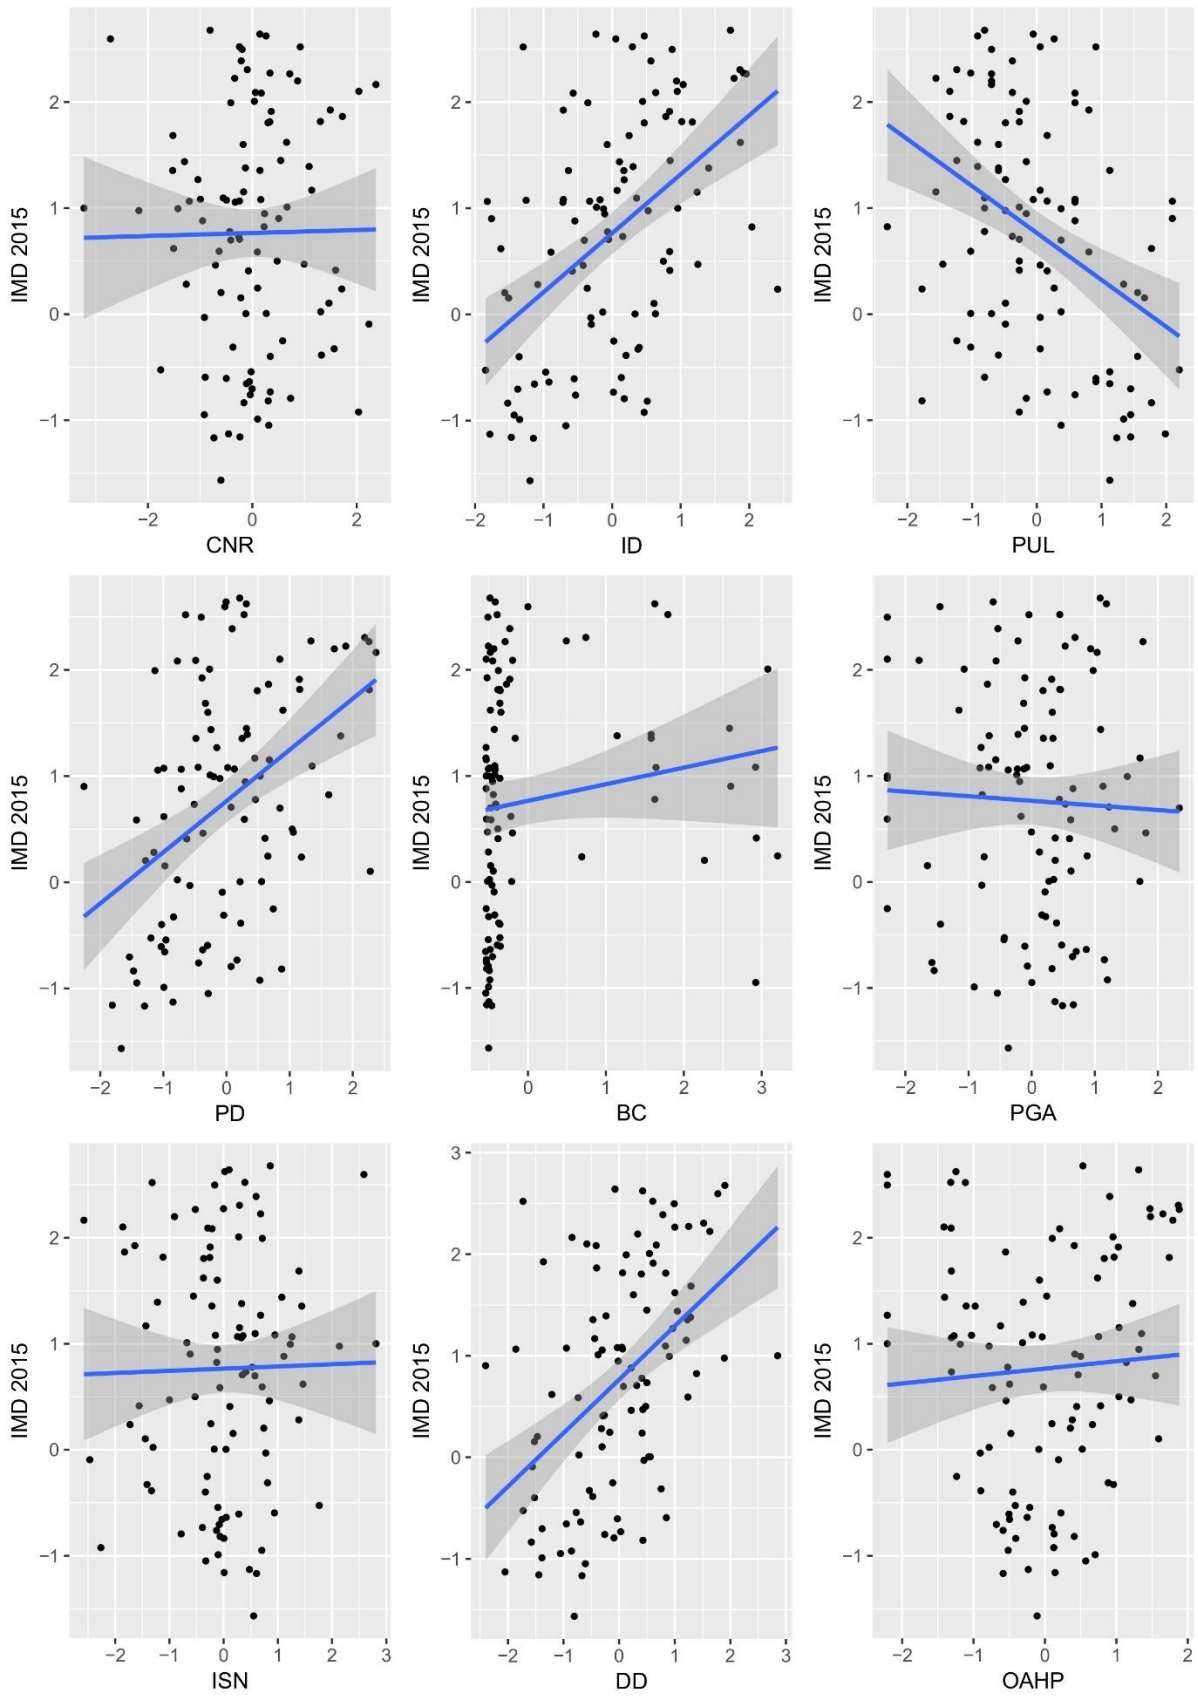

Figure 5. Correlations between metrics of urban form and IMD, for Liverpool.

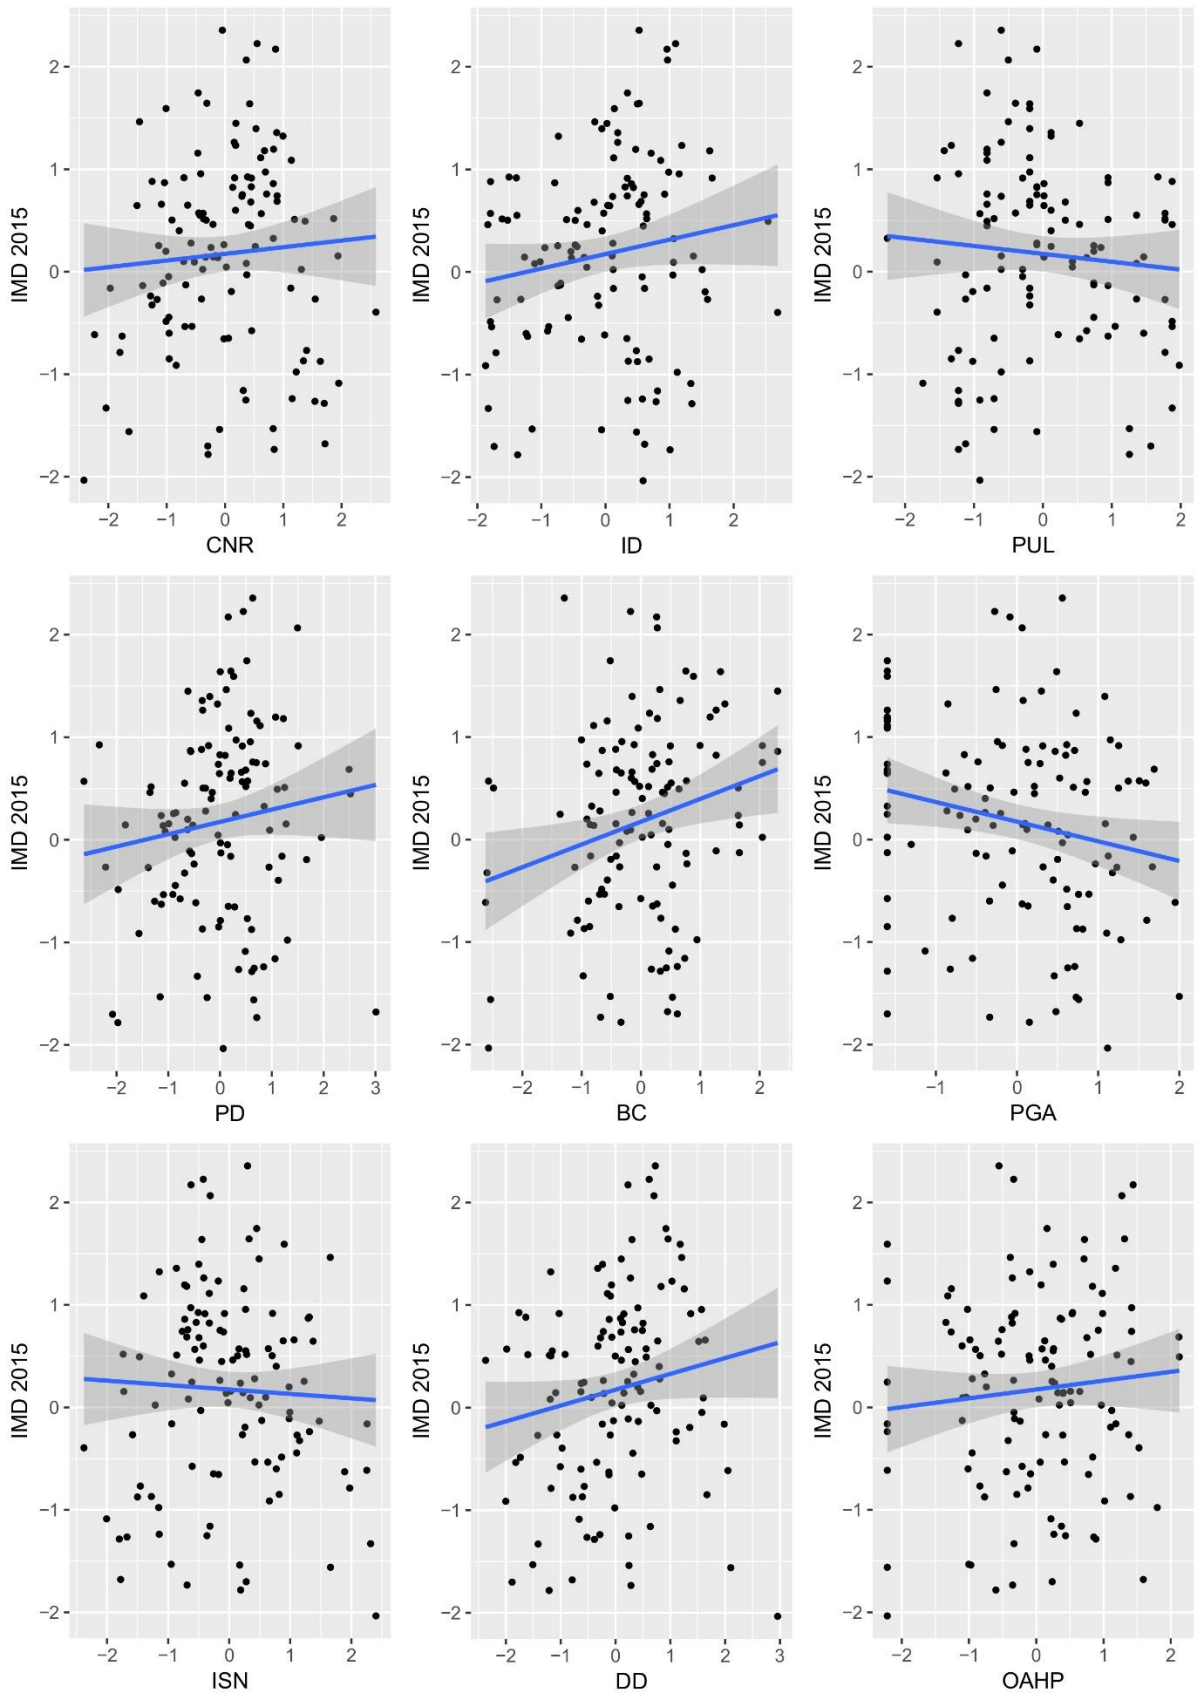

Figure 6. Correlations between metrics of urban form and IMD, for Newcastle.

These correlation plots have been mainly produced to provide visual proof of the absence of patterns of non-linearity. Since cities are complex entities, which are better understood by modelling multiple urban features simultaneously rather than in isolation, the relationships between single metrics of urban form and IMD are only exploratory. We refer to the paper, section Results, for the outcomes of the models with multiple features.
